# Supplementary material for: The role of coccoliths in protecting Emilianiahuxleyi against stressful light and UV radiation
Source: Copernicus journal article supplement (doi:10.5194/bg-13-4637-2016), 2016-08-18
Supplement: Supplementary file 1 [file bg-13-4637-2016-supplement.zip]

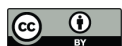

## *Supplement of*

# **The role of coccoliths in protecting *Emiliana huxleyi* against stressful light and UV radiation**

**Juntian Xu et al.**

*Correspondence to:* Kunshan Gao (ksgao@xmu.edu.cn)

- bg-13-4637-2016-supplement-title-page.pdf
- raw data.xlsx

The copyright of individual parts of the supplement might differ from the CC-BY 3.0 licence.
